# Supplementary material for: Highly stable folic acid functionalized copper-nanocluster/silica nanoparticles for selective targeting of cancer cells
Source: Royal Society of Chemistry journal article supplement (doi:10.1039/d0ra06523d), 2020-01-01
Supplement: d0ra06523d1.pdf [file d0ra06523d1.pdf]

## Supplementing Information

### Highly stable folic acid functionalized copper-nanocluster/silica nanoparticles for selective targeting of cancer cells

Xiaoming Fang<sup>†</sup> Yanhua Huang<sup>†</sup>, Dan Yu, Caiwen Shi and Ming Liu\*

E-mail: [2306051553@qq.com](mailto:2306051553@qq.com).

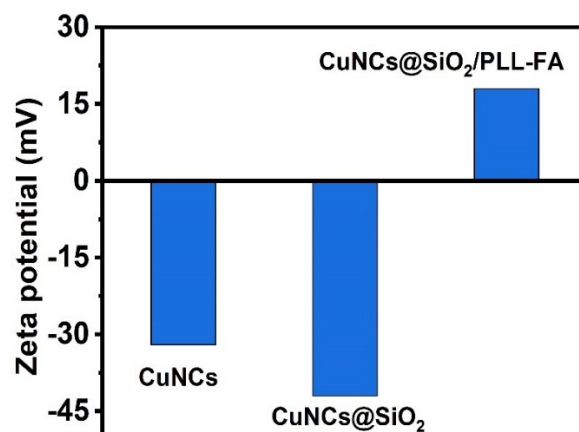

Fig. S1 Zeta potential histogram of CuNCs, CuNCs@SiO<sub>2</sub> and CuNCs@SiO<sub>2</sub>/PLL-FA.

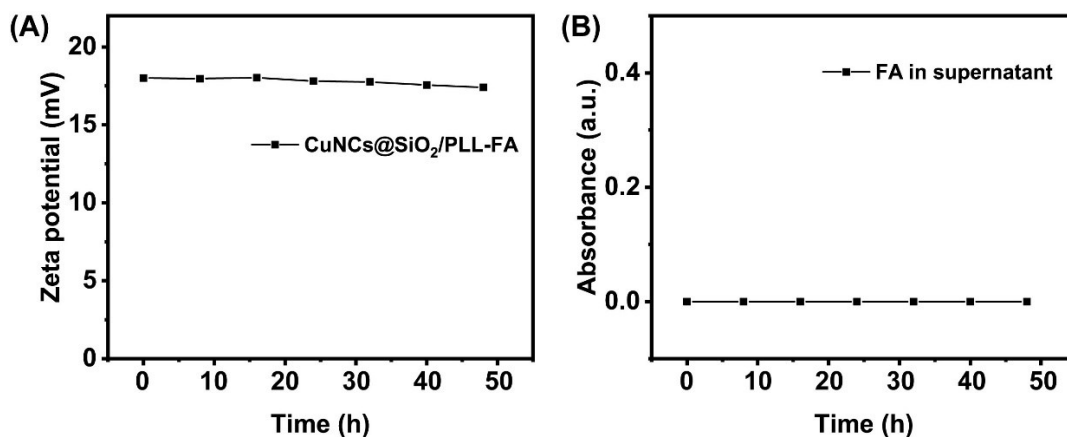

Fig. S2 (A) Variation of zeta potential of CuNCs@SiO<sub>2</sub>/PLL-FA nanocomposites after incubated in PBS buffer (pH=7.4) for continuous 48 hours, which presents slight change at each 4 hours interval, demonstrating their excellent colloidal stability. (B) Absorbance at 360 nm of the supernatant separated from CuNCs@SiO<sub>2</sub>/PLL-FA nanocomposites after incubated in PBS buffer for continuous 48 hours. The supernatant shows no obvious absorbance of FA indicating that the CuNCs@SiO<sub>2</sub>/PLL-FA nanocomposites are stable in biological environment for cell detection contributed to the tough conjugation of FA on the surface.

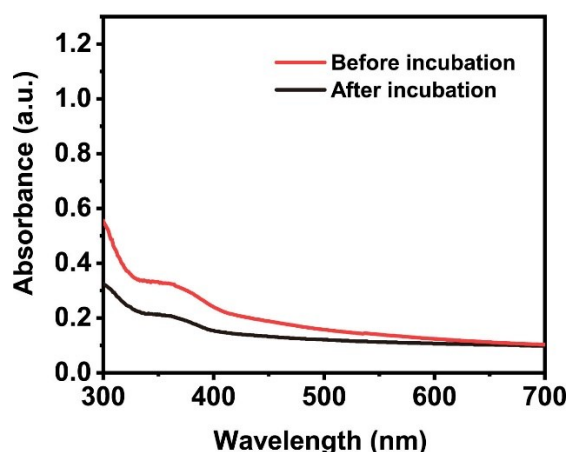

**Fig. S3** UV-vis absorption spectra of PLL-FA before conjugated with CuNCs@SiO<sub>2</sub> (red line) and the supernatant separated from CuNCs@SiO<sub>2</sub>/PLL-FA nanocomposites (black line).

Following the calculation of FA on each CuNCs@SiO<sub>2</sub>/PLL-FA:

According to the Beer–Lambert law

$$A = Kbc \quad 1.$$

A is the absorbance

K is the molar attenuation coefficient

b is the optical path length

c is the concentration of the attenuating species

For pure FA,  $A=0.5$ ,  $c=1.9 \times 10^{-4}$  M (from UV-vis measurement), and  $Kb$  is  $2.6 \times 10^3$  derived from 1.

From Fig. S3, the absorbance of PLL-FA at 360 nm before and after conjugated with CuNCs@SiO<sub>2</sub> is 0.33 and 0.21, respectively. Based on equation 1. and the value of  $Kb$ , the concentration of PLL-FA conjugated with CuNCs@SiO<sub>2</sub> is  $0.46 \times 10^{-4}$  M. The volume of the solution is 21 mL, thus the total quantity (N) of FA conjugated on CuNCs@SiO<sub>2</sub> is  $9.66 \times 10^{-7}$  M.

The weight (m) of CuNCs@SiO<sub>2</sub> is 23 mg (deducting the weight of CuNCs), the density ( $\rho$ ) of SiO<sub>2</sub> is  $2.2 \text{ g/cm}^3$ ,<sup>1</sup> and the diameter (d) of the CuNCs@SiO<sub>2</sub> is 52 nm.

$$m = n \times \rho \times \frac{4}{3} \pi \times (d/2)^3 \quad 2.$$

n is calculated ca.  $1.42 \times 10^{14}$  from equation 2.

The number of FA conjugated on each CuNCs@SiO<sub>2</sub> is calculated by the equation of  $N \times N_A/n$  ( $N_A=6.02 \times 10^{23}$ ), which is derived ca. 4095.

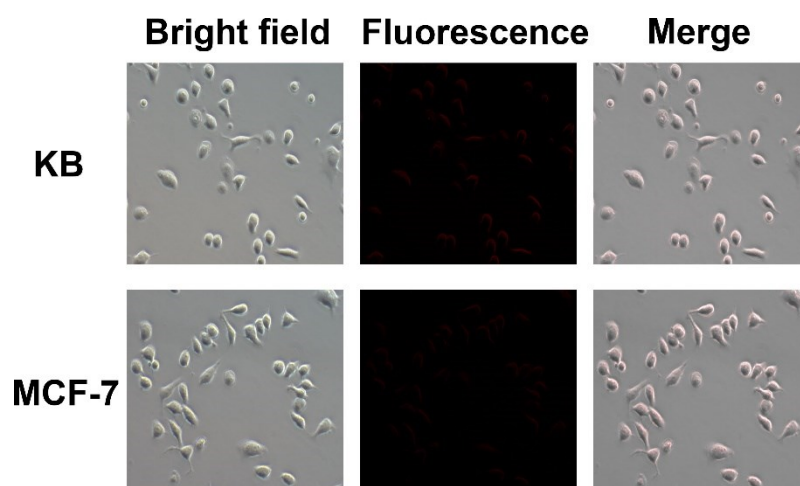

**Fig. S4** Micrographs of KB cells (upper panel) and MCF-7 cells (lower panel) after incubated with CuNCs@SiO<sub>2</sub>/PLL nanoparticles (50 µg/mL) for 12 h. Left: phase-contrast bright field images. Middle: fluorescence images. Right: the overlapped images of bright field and fluorescence images. For MCF-7 cells, the fluorescence signals are both weak after incubated with CuNCs@SiO<sub>2</sub>/PLL and CuNCs@SiO<sub>2</sub>/PLL-FA indicating that a few nanoprobos were internalized by MCF-7 cells. Compared with KB cells, the uptake of CuNCs@SiO<sub>2</sub>/PLL-FA increased contributed to the high FR in KB cells.

## References

1. T. Yu, A. Malugin and H. Ghandehari, *ACS Nano*, 2011, **5**, 5717-5728.
